# Supplementary material
Source: PubMed Central journal article supplement (PMC7083174)
Supplement: NIHMS1564543-supplement-1.pdf [file NIHMS1564543-supplement-1.pdf]

## **Methods:**

### **Study design and Subjects**

Participants were from Project Viva, a prospective pre-birth cohort study that recruited women during early pregnancy from Atrius Harvard Vanguard Medical Associates, a multi-specialty group practice in Eastern Massachusetts. Mothers were enrolled between April 1999 and July 2002. Detailed enrollment criteria have been described previously (E1). In-person interviews and questionnaires were conducted in early pregnancy after the initial prenatal visit (average of 9.9 weeks of gestation), and mid-pregnancy at 26-28 weeks of gestation. Interviews and questionnaires on child health were administered at 6 months, 1 year, and annually thereafter. Of the 2,128 live births, we included 1,148 participants with outcome data at the early teen visit (mean age 13.3 years). Compared with the included participants, those excluded were less likely to have mothers with a graduate degree (23.5% versus 34.2%) and were more likely to have mothers who smoked during pregnancy (16.9% versus 9.0%). However, prevalence of parental atopy was similar (56.7% versus 59.2%) as was adolescent race/ethnicity (18.3% versus 15.6% non-Hispanic black; 10.9% versus 9.5% Hispanic) (**Table E3**). The institutional review boards of Brigham and Women's Hospital and Harvard Pilgrim Health Care approved this study.

### **Assessment of Child Race/Ethnicity and Maternal SES during Pregnancy**

We determined the race/ethnicity of the adolescent by asking the mother to choose one or more racial/ethnic groups for her child. We created four racial/ethnic groups based on the mother's response including non-Hispanic white (reference category), non-Hispanic black, Hispanic (regardless of race if also checked), and other (mixed race, Asian or Pacific Islander, American Indian or Alaskan Native, and other).

We examined the following measures of home environment and indicators of SES: maternal education, smoking by the mother during pregnancy and by anyone in the home during the child's first year of life, household income, and median household income from the neighborhood census tract. Mothers reported their highest level of educational attainment, personal smoking, and household income on questionnaires during pregnancy. Mothers also reported household smoking on the 6 month and year one postpartum questionnaires. Median annual income for census tract of residence at the time of study enrollment was determined using data from the 2000 United States Census. We defined low neighborhood income as a census tract in the lowest quartile of the distribution of our study population (<\$41,771 per year), all of whom lived in the greater Boston area at study enrollment.

### **Adolescent Allergy Outcomes**

Of the 1,148 children who presented for the in-person visit (age 11.2 to 16.6 years), 701 had blood drawn and 647 had samples sufficient to measure allergen-specific IgE levels by Phadia ImmunoCap (age 11.9 to 16.4 years). Food sensitivity to each food allergen (milk, egg, peanut, soy, or wheat) was defined as positive if the respective food specific IgE level was >0.35 kU/L.

We inquired about allergic-type symptoms following allergen intake with the question: "Which of the following food(s) is your child allergic to? Specify the reaction(s) that your child had within one hour of eating them. Please check as many reactions for each food as needed." The listed reactions were: hives on one body part, hives on more than one body part, nausea/vomiting, diarrhea, wheezing, trouble breathing, itchy throat or mouth, coughing, sneezing, runny or stuffy nose, loss of consciousness, eczema or worsening eczema. The foods

listed included milk, egg, peanut, soy, wheat and also other allergens (e.g. other nuts and shellfish which we did not investigate because there was no corresponding IgE measure). We considered an adolescent to have had food allergy symptoms to one of the 5 common food allergens if their mother reported that the child had one or more of these symptoms to that food. We also classified each adolescent based on whether the mother reported allergic-type reaction to any food. We did not collect data on physician-diagnosed food allergy.

### **Statistical Analysis**

We assessed associations of adolescent race/ethnicity and measures of SES with odds of allergic sensitization and symptoms to each of the 5 common food allergens using logistic regression models. We used prevalence ratios rather than odds ratios for sensitization to peanut and wheat because the outcome was common (the prevalence was >27% among black and “other” race/ethnicity participants). To estimate prevalence ratios, we used PROC GENMOD’s log-binomial regression (SAS Institute, Cary, NC) as described by Spiegelman and colleagues (E2). All models adjusted for adolescent age, sex, and race/ethnicity and parental history of atopy. Parental history of atopy was defined as positive if either parent was reported to have asthma, allergic rhinitis, or atopic dermatitis.

### **References**

- E1. Oken E, Baccarelli AA, Gold DR, Kleinman KP, Litonjua AA, De Meo D, et al. Cohort profile: project viva. *Int J Epidemiol*. 2015 Feb;44(1):37–48.
- E2. Spiegelman D, Hertzmark E. Easy SAS calculations for risk or prevalence ratios and

differences. Vol. 162, American journal of epidemiology. United States; 2005. p. 199–200.

**Table E1: Participant Characteristics** of 1,148 adolescents in Project Viva, overall and according to race/ethnicity

|                                                                           | Adolescent race/ethnicity |                             |                             |                   |                |
|---------------------------------------------------------------------------|---------------------------|-----------------------------|-----------------------------|-------------------|----------------|
|                                                                           | Overall<br>n=1148         | Non-Hispanic White<br>n=749 | Non-Hispanic Black<br>n=179 | Hispanic<br>n=109 | Other<br>n=110 |
|                                                                           | Mean (SD) or %            |                             |                             |                   |                |
| <b>Adolescent</b>                                                         |                           |                             |                             |                   |                |
| Female                                                                    | 48.4%                     | 49.7%                       | 45.3%                       | 45.0%             | 48.2%          |
| Age at early teen visit, years                                            | 13.3 (1.0)                | 13.3 (1.0)                  | 13.3 (1.0)                  | 13.3 (1.0)        | 13.2 (0.9)     |
| <b>Mother</b>                                                             |                           |                             |                             |                   |                |
| Education                                                                 |                           |                             |                             |                   |                |
| . <College graduate                                                       | 28.0%                     | 17.0%                       | 57.0%                       | 60.2%             | 24.8%          |
| . College grad                                                            | 37.7%                     | 43.5%                       | 31.3%                       | 18.5%             | 27.5%          |
| . Graduate degree                                                         | 34.2%                     | 39.5%                       | 11.7%                       | 21.3%             | 47.7%          |
| Smoked during pregnancy                                                   | 9.0%                      | 8.0%                        | 10.7%                       | 13.0%             | 9.1%           |
| <b>Family/household</b>                                                   |                           |                             |                             |                   |                |
| Parental history of atopy                                                 | 59.2%                     | 59.9%                       | 54.2%                       | 59.3%             | 62.4%          |
| Annual household income                                                   |                           |                             |                             |                   |                |
| . ≤\$40,000                                                               | 14.2%                     | 5.0%                        | 44.8%                       | 39.3%             | 17.8%          |
| . \$40,001-70,000                                                         | 21.2%                     | 21.5%                       | 24.6%                       | 18.0%             | 17.8%          |
| . >\$70,000                                                               | 64.6%                     | 73.6%                       | 30.6%                       | 42.7%             | 64.4%          |
| Any smokers in the household<br>(in first year)                           | 13.0%                     | 9.7%                        | 24.3%                       | 22.1%             | 11.3%          |
| <b>Neighborhood at enrollment</b>                                         |                           |                             |                             |                   |                |
| Census tract median household income<br>(lowest quartile, <\$41,771/year) | 23.2%                     | 9.0%                        | 66.7%                       | 45.0%             | 28.2%          |

**Table E2: Adolescent Outcomes**

Data from 647 adolescents participating in Project Viva who had IgE samples (upper portion) and from 1,145 adolescents whose's mothers completed the symptom questionnaire (lower portion)

| IgE >0.35 kU/L           | Adolescent race/ethnicity |                                     |                                     |                           |                        |
|--------------------------|---------------------------|-------------------------------------|-------------------------------------|---------------------------|------------------------|
|                          | Overall<br>n=647          | Non-Hispanic White<br>n=400         | Non-Hispanic Black<br>n=113         | Hispanic<br>n=71          | Other<br>n=63          |
|                          | N (%)                     |                                     |                                     |                           |                        |
| Milk                     | 71 (11.0)                 | 40 (10.0)                           | 15 (13.3)                           | 10 (14.1)                 | 6 (9.5)                |
| Egg                      | 50 (7.7)                  | 25 (6.3)                            | 11 (9.7)                            | 7 (9.9)                   | 7 (11.1)               |
| Peanut                   | 110 (17.0)                | 50 (12.5)                           | 31 (27.4)                           | 11 (15.5)                 | 18 (28.6)              |
| Soy                      | 62 (9.6)                  | 32 (8.0)                            | 14 (12.4)                           | 7 (9.9)                   | 9 (14.3)               |
| Wheat                    | 128 (19.8)                | 71 (17.8)                           | 32 (28.3)                           | 8 (11.3)                  | 17 (27.0)              |
| <b>Allergic symptoms</b> | <b>Overall<br/>n=1145</b> | <b>Non-Hispanic White<br/>n=747</b> | <b>Non-Hispanic Black<br/>n=179</b> | <b>Hispanic<br/>n=109</b> | <b>Other<br/>n=109</b> |
|                          | N (%)                     |                                     |                                     |                           |                        |
| Milk                     | 14 (1.2)                  | 9 (1.2)                             | 3 (1.7)                             | 0                         | 2 (1.8)                |
| Egg                      | 9 (0.8)                   | 5 (0.7)                             | 3 (1.7)                             | 0                         | 1 (0.9)                |
| Peanut                   | 46 (4.0)                  | 20 (2.7)                            | 11 (6.1)                            | 4 (3.7)                   | 11 (10.1)              |
| Soy                      | 6 (0.5)                   | 5 (0.7)                             | 1 (0.6)                             | 0                         | 0                      |
| Wheat                    | 9 (0.8)                   | 6 (0.8)                             | 1 (0.6)                             | 0                         | 2 (1.8)                |

**Table E3: Characteristics of Included and Excluded Participants**

|                                                                           | Included Participants<br>n=1,148 | Excluded Participants<br>n=980 | p-Value |
|---------------------------------------------------------------------------|----------------------------------|--------------------------------|---------|
| <b>Adolescent</b>                                                         |                                  |                                |         |
| Sex                                                                       |                                  |                                | 0.95    |
| . Female                                                                  | 48.4%                            | 49.6%                          |         |
| Race/Ethnicity                                                            |                                  |                                | 0.21    |
| . Non-Hispanic white                                                      | 65.3%                            | 61.6%                          |         |
| . Non-Hispanic black                                                      | 15.6%                            | 18.3%                          |         |
| . Hispanic                                                                | 9.5%                             | 10.9%                          |         |
| . Other                                                                   | 9.6%                             | 9.1%                           |         |
| <b>Mother</b>                                                             |                                  |                                |         |
| Education                                                                 |                                  |                                | <.001   |
| . <College graduate                                                       | 28.0%                            | 44.1%                          |         |
| . College grad                                                            | 37.7%                            | 32.4%                          |         |
| . Graduate degree                                                         | 34.2%                            | 23.5%                          |         |
| Smoked during pregnancy                                                   | 9%                               | 16.9%                          | <.001   |
| <b>Family/household</b>                                                   |                                  |                                |         |
| Parental history of atopy                                                 | 59.2%                            | 56.7%                          | 0.25    |
| Annual household income                                                   |                                  |                                | 0.003   |
| . ≤\$40,000                                                               | 14.2%                            | 17.5%                          |         |
| . \$40,001-70,000                                                         | 21.2%                            | 25.7%                          |         |
| . >\$70,000                                                               | 64.6%                            | 56.8%                          |         |
| Any smokers in the household<br>(in first year)                           | 13.0%                            | 14.9%                          | 0.27    |
| <b>Neighborhood at enrollment</b>                                         |                                  |                                |         |
| Census tract median household income<br>(lowest quartile, <\$41,771/year) | 23.2%                            | 27.1%                          | 0.04    |
